# Supplementary material
Source: Copernicus journal article supplement (doi:10.5194/acp-26-8341-2026)
Supplement: Supplementary file 1 [file acp-26-8341-2026-supplement.pdf]

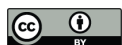

*Supplement of*

## **Marine-derived water-soluble organic nitrogen in coastal air: influence of ocean productivity on atmospheric nitrogen cycling**

**Jiao Tang et al.**

*Correspondence to:* Shujie Hu ([hushujie@cigit.ac.cn](mailto:hushujie@cigit.ac.cn)) and Shizhen Zhao ([zhaoshizhen@gig.ac.cn](mailto:zhaoshizhen@gig.ac.cn))

The copyright of individual parts of the supplement might differ from the article licence.

## 1 **Text S1. PMF model**

### 2 Data Input

3 The data input includes concentrations and uncertainties of various types of chemicals  
4 in 84 TSP samples. The types of chemicals include WSON, OC, EC, metal elements  
5 (Ni, V, Pb, Cu, Zn, Mn, Fe, Al), water-soluble ions ( $K^+$ ,  $Na^+$ ,  $Mg^{2+}$ ,  $Ca^{2+}$ ,  $NH_4^+$ ,  $Cl^-$ ,  $SO_4^{2-}$ ,  
6  $NO_3^-$ ), biomass burning tracers (levoglucosan, mannosan, galactosan), steranes,  
7 hopanes, and SOA tracers (2-MGA, 2MGL, MBTCA, o/p-phthalic acid). The uncertainty  
8 file provides species-specific parameters that EPA PMF 5.0 uses to calculate  
9 uncertainties for each sample. If the concentration is less than or equal to the method  
10 detection limit (MDL), the uncertainty (Unc) is calculated using a fixed fraction of the  
11 MDL (1), and the concentration is replaced with half of the MDL.

$$12 \text{ Unc} = \frac{5}{6} \times \text{MDL} \quad (1)$$

13 If the concentration is higher than the MDL, the calculation is based on a user- provided  
14 fraction of the concentration and MDL (Equation 2). Al element was set as bad,  
15 resulting in solutions that didn't converge. Weak signals were found for species of  
16 galactosan, mannosan, levoglucosan, hopanes and steranes, 2-MGA, and o-Phthalic  
17 acid, which had a low signal-to-noise ratio ( $S/N < 3$ ). Other species with an S/N greater  
18 than 3 were set as strong.

$$19 \text{ Unc} = \sqrt{(\text{Error Fraction} \times \text{concentrations})^2 + (0.5 \times \text{MDL})^2} \quad (2)$$

### 20 Model run

21 The PMF model was executed using three to seven factors, 100 runs, and a random  
22 starting point, resulting in converged solutions. Despite yielding the lowest  $Q_{\text{robust}}/Q_{\text{true}}$   
23 ratio (1.043, approaching unity), the six-factor solution exhibited mixing of the  $NH_4^+$   
24 and  $SO_4^{2-}$  with biomass burning tracers. This chemically implausible separation  
25 rendered the six-factor interpretation problematic. Consequently, the seven-factor  
26 solution was selected for source profile analysis as it provided physically meaningful  
27 resolution.

28 *For WSON was set as the total variable:*

29 Uncertainty Estimation: To understand the uncertainty of the seven-factor solution, we  
30 did a complementary analysis of displacement (DISP), BS, and bootstrapping with  
31 displacement (BS-DISP). We used DISP intervals to include the effects of rotational  
32 ambiguity, but not the effects of random errors in the data. BS intervals included the  
33 effects of random errors and partially included the effects of rotational ambiguity. Finally,  
34 BS-DISP intervals included the effects of both random errors and rotational ambiguity.  
35 Tables S4–S5 show that the seven-factor solutions for WSON do not have significant

36 rotational ambiguity, and the base model and error estimates can be interpreted. With  
37 the absence of any swaps,  $dQ_{\max}$  provides confidence that these solutions are well  
38 constrained.

39 As shown in Figure S8, factor 1 was linked to high contribution of V, suggesting that it  
40 came from a shipping emission source (Celo et al., 2015; Viana et al., 2009). Factor 2  
41 was characterized by high levels of  $\text{NH}_4^+$  and  $\text{SO}_4^{2-}$ , which was a secondary sulfate  
42 source. Factor 3 (dust) showed a high contribution of Mn (69 %), Fe,  $\text{Mg}^{2+}$ , and  $\text{Ca}^{2+}$ .  
43 Factor 4 was identified as SOA source because it was associated with high loadings  
44 of 2-MGA, 2-MGL, MBTCA, and p-phthalic acid. Factor 5 was linked to biomass  
45 burning, with high loadings of galactosan, mannosan, and levoglucosan,  $\text{NH}_4^+$ ,  $\text{NO}_3^-$ ,  
46 and p-phthalic acid also had high loading for this source, as reported in the source  
47 profiles of biomass burning (Li et al., 2007). Factor 6 showed high loadings with Pb,  
48 Cu, and Zn and was identified as vehicle emissions and fossil fuel combustion. Factor  
49 7 was associated with high levels of  $\text{Na}^+$ ,  $\text{Cl}^-$ , and  $\text{Mg}^{2+}$ , which was identified as sea  
50 spray aerosols via the bubble-busting processes (Facchini et al., 2008).

### 51 **Text S2. Potential Source Contribution Function (PSCF) Model**

52 The PSCF model facilitates the identification of source region by partitioning the  
53 potential source domain into a grid matrix of  $i \times j$ , as detailed in our previous study  
54 (Geng et al., 2020; Tang et al., 2024). The PSCF analysis typically generates  $\text{PSCF}_{ij}$   
55 values ranging from 0 to 1, with elevated  $\text{PSCF}_{ij}$  suggesting an increased likelihood  
56 that the  $ij_{\text{th}}$  cell being the source region. A notable constraint of PSCF-based  
57 methodologies is the necessity to establish a weighing function to designed to diminish  
58 the influences of cells with minimal residence time, a phenomenon often manifested  
59 as “trailing effects” (Petit et al., 2017). To investigate the partitioning of aerosol sources  
60 and to ascertain the contributions of various aerosol emission sources and  
61 transportation mechanisms, we conducted a weighted Potential Source Contribution  
62 Function (WPSCF) analysis. Given that PSCF represents a conditional probability, the  
63 associated error escalates with increased distance between the grid and the sample  
64 points (Tiwari et al., 2018). In this investigation, the experimental area was divided into  
65 a  $0.25^\circ \times 0.25^\circ$  grid. The threshold for the computation of  $m_{ij}$  was established at the 75th  
66 percentile. To mitigate the impact of small  $n_{ij}$  values on PSCF, a weighting function was  
67 applied (Tiwari et al., 2018):

$$68 \quad w_{ij} = \begin{cases} 1.00 & n_{ij} > 80 \\ 0.70 & 20 < n_{ij} \leq 80 \\ 0.42 & 10 < n_{ij} \leq 20 \\ 0.05 & n_{ij} \leq 10 \end{cases} \quad (3)$$

### 69 **Text S3. Predicting ALWC Using a Thermodynamic Model**

70 To predict the mass concentration of aerosol liquid water content (ALWC), we used a

71 thermodynamic model, ISORROPIA-II, <http://nenes.eas.gatech.edu/ISORROPIA/>,  
72 which calculates the ALW concentration with particle-phase concentrations of  $\text{Na}^+$ ,  
73  $\text{SO}_2^-$ ,  $\text{NH}_4^+$ ,  $\text{NO}_3^-$ ,  $\text{Cl}^-$ ,  $\text{Ca}^{2+}$ ,  $\text{K}^+$ , and  $\text{Mg}^{2+}$ , as well as meteorological conditions (RH  
74 and ambient temperature) as the input (Fountoukis and Nenes, 2007), which was  
75 described in our previous studies (Xu et al., 2022). Briefly, the contributions of particle  
76 water associated with organic fractions to ALW were estimated by calculating the  
77 organic hygroscopicity parameter. ALW was calculated as the sum of water associated  
78 with individual aerosol chemical components (i.e., the sum of ions and lumped organics)  
79 based on the Zdanovskii–Stokes–Robinson (ZSR) relationship.

80

81 **Table S1.** The concentrations of TSP, OC, EC, WSON, NH<sub>4</sub><sup>+</sup>-N, NO<sub>3</sub><sup>-</sup>-N, and the ratios of OC/EC and WSON/WSON. In addition, the  
82 meteorological data, including relative humidity (RH), wind speed (WS), and temperature (Temp.) were also presented. Precipitation and radiation  
83 data are obtained from historical reanalysis datasets from European Centre for Medium-Range Weather Forecasts (ECMWF). Cluster indicates  
84 the air masses analyzed by HYSPLIT in Figures 1b and S1–S2.

| Date      | TSP<br>( $\mu\text{g m}^{-3}$ ) | OC<br>( $\mu\text{g m}^{-3}$ ) | EC ( $\mu\text{g m}^{-3}$ ) | OC/EC | WSON<br>( $\mu\text{gN m}^{-3}$ ) | NH <sub>4</sub> <sup>+</sup> -N<br>( $\mu\text{gN m}^{-3}$ ) | NO <sub>3</sub> <sup>-</sup> -N<br>( $\mu\text{gN m}^{-3}$ ) | RH<br>(%) | WS<br>(mph) | Temp.<br>(°C) | Precipitation<br>(mm) | Radiation<br>(W m <sup>-2</sup> ) | Cluster |
|-----------|---------------------------------|--------------------------------|-----------------------------|-------|-----------------------------------|--------------------------------------------------------------|--------------------------------------------------------------|-----------|-------------|---------------|-----------------------|-----------------------------------|---------|
| 2016/1/18 | 42                              | 10                             | 1.7                         | 6.1   | 0.31                              | 0.11                                                         | 0.55                                                         | 80        | 5.6         | 29            | 0.453                 | 2845.62                           | 1       |
| 2016/1/25 | 66                              | 19                             | 1.4                         | 13    | 0.73                              | 0.32                                                         | 0.73                                                         | 65        | 11          | 17            | 0.049                 | 456.26                            | 3       |
| 2016/2/1  | 97                              | 18                             | 2.4                         | 7.7   | 1.2                               | 0.34                                                         | 1.6                                                          | 75        | 4.3         | 30            | 0.264                 | 4340.11                           | 1       |
| 2016/2/8  | 161                             | 38                             | 2.8                         | 14    | 1.1                               | 2.2                                                          | 2.7                                                          | 43        | 7.8         | 21            | 0.000                 | 8144.62                           | 5       |
| 2016/2/15 | 88                              | 15                             | 1.9                         | 8.0   | 1.3                               | 0.28                                                         | 1.1                                                          | 76        | 5.8         | 30            | 0.115                 | 3605.48                           | 1       |
| 2016/2/22 | 60                              | 11                             | 1.8                         | 5.9   | 0.89                              | 0.58                                                         | 1.3                                                          | 74        | 6.7         | 29            | 0.017                 | 3355.82                           | 2       |
| 2016/2/29 | 118                             | 23                             | 1.9                         | 12    | 1.3                               | 1.1                                                          | 0.69                                                         | 48        | 5.0         | 29            | 0.000                 | 4671.43                           | 3       |
| 2016/3/4  | 101                             | 13                             | 1.6                         | 8.1   | 1.3                               | 0.40                                                         | 0.75                                                         | 71        | 6.8         | 30            | 0.004                 | 4642.70                           | 1       |
| 2016/3/8  | 47                              | 8.7                            | 1.3                         | 6.7   | 0.35                              | 0.51                                                         | 0.98                                                         | 74        | 9.2         | 30            | 0.094                 | 4934.61                           | 2       |
| 2016/3/10 | 37                              | 9.7                            | 1.6                         | 6.0   | 0.50                              | 0.34                                                         | 0.58                                                         | 78        | 7.5         | 30            | 0.000                 | 4929.85                           | 2       |
| 2016/3/14 | 33                              | 8.0                            | 1.3                         | 6.2   | 0.49                              | 0.10                                                         | 0.45                                                         | 73        | 7.8         | 31            | 0.000                 | 5116.68                           | 2       |
| 2016/3/16 | 40                              | 9.9                            | 1.4                         | 7.3   | 0.41                              | 0.22                                                         | 0.56                                                         | 69        | 9.7         | 31            | 0.005                 | 5223.13                           | 2       |
| 2016/3/18 | 59                              | 10                             | 1.4                         | 7.5   | 0.71                              | 0.52                                                         | 0.50                                                         | 74        | 9.4         | 31            | 0.001                 | 5809.82                           | 2       |
| 2016/3/20 | 51                              | 8.0                            | 1.0                         | 7.9   | 0.60                              | 0.48                                                         | 0.44                                                         | 74        | 11          | 31            | 0.000                 | 5953.51                           | 2       |
| 2016/3/22 | 80                              | 13                             | 1.6                         | 8.1   | 0.91                              | 0.75                                                         | 0.34                                                         | 74        | 9.0         | 31            | 0.000                 | 7301.90                           | 2       |
| 2016/3/24 | 111                             | 15                             | 1.7                         | 8.9   | 0.65                              | 1.26                                                         | 0.55                                                         | 64        | 7.3         | 32            | 0.000                 | 6984.91                           | 1       |
| 2016/3/26 | 54                              | 11                             | 1.2                         | 9.3   | 0.80                              | 0.71                                                         | 0.78                                                         | 59        | 8.3         | 30            | 0.184                 | 3269.41                           | 3       |

|           |     |     |      |     |      |      |      |    |     |    |       |         |   |
|-----------|-----|-----|------|-----|------|------|------|----|-----|----|-------|---------|---|
| 2016/3/28 | 111 | 24  | 2.1  | 12  | 1.2  | 2.10 | 2.7  | 68 | 7.1 | 29 | 0.016 | 2870.25 | 4 |
| 2016/3/30 | 57  | 11  | 1.4  | 7.6 | 0.84 | 0.54 | 0.94 | 77 | 6.2 | 30 | 1.276 | 3838.34 | 2 |
| 2016/4/1  | 43  | 8.3 | 1.3  | 6.2 | 0.54 | 0.39 | 0.82 | 71 | 8.7 | 31 | 0.278 | 4539.01 | 2 |
| 2016/4/3  | 18  | 6.1 | 0.83 | 7.3 | 0.57 | 0.35 | 0.39 | 68 | 8.7 | 31 | 0.012 | 4226.13 | 2 |
| 2016/4/5  | 28  | 6.9 | 1.1  | 6.2 | 0.64 | 0.13 | 0.39 | 69 | 8.8 | 32 | 0.168 | 5370.84 | 2 |
| 2016/4/7  | 35  | 8.7 | 1.2  | 7.2 | 0.57 | 0.31 | 0.32 | 72 | 10  | 32 | 0.064 | 3968.69 | 2 |
| 2016/4/9  | 25  | 5.4 | 0.95 | 5.7 | 0.53 | 0.09 | 0.24 | 67 | 10  | 32 | 0.012 | 5640.03 | 2 |
| 2016/4/13 | 63  | 8.7 | 1.3  | 6.6 | 0.59 | 1.8  | 0.28 | 55 | 9.8 | 33 | 0.000 | 6572.45 | 1 |
| 2016/4/15 | 37  | 7.1 | 0.95 | 7.5 | 0.41 | 1.1  | 0.12 | 65 | 9.8 | 33 | 0.224 | 5262.17 | 2 |
| 2016/4/17 | 32  | 7.9 | 0.16 | 49  | 0.27 | 1.1  | 0.10 | 71 | 9.7 | 33 | 0.544 | 5817.36 | 2 |
| 2016/4/19 | 26  | 6.2 | 1.1  | 5.9 | 0.41 | 0.57 | 0.12 | 68 | 9.7 | 32 | 0.448 | 5535.08 | 2 |
| 2016/4/21 | 34  | 6.6 | 0.91 | 7.2 | 0.57 | 0.07 | 0.41 | 63 | 9.9 | 32 | 0.372 | 4912.19 | 2 |
| 2016/4/23 | 38  | 8.4 | 0.99 | 8.5 | 0.92 | 0.08 | 0.35 | 65 | 10  | 33 | 0.311 | 5393.97 | 2 |
| 2016/4/25 | 40  | 9.8 | 1.1  | 8.6 | 0.98 | 0.35 | 0.26 | 69 | 9.7 | 33 | 0.218 | 5708.40 | 2 |
| 2016/4/27 | 47  | 11  | 1.2  | 8.5 | 1.2  | 0.53 | 0.44 | 69 | 9.7 | 33 | 0.438 | 4995.66 | 2 |
| 2016/4/29 | 29  | 7.1 | 1.0  | 7.1 | 0.84 | 0.36 | 0.16 | 72 | 9.1 | 33 | 0.152 | 4496.61 | 2 |
| 2016/5/1  | 20  | 5.4 | 0.96 | 5.6 | 0.84 | 0.23 | 0.20 | 74 | 6.4 | 30 | 0.580 | 4786.53 | 1 |
| 2016/5/3  | 23  | 5.7 | 1.3  | 4.3 | 0.77 | 0.31 | 0.18 | 63 | 8.5 | 33 | 0.443 | 5948.07 | 2 |
| 2016/5/5  | 21  | 5.4 | 0.91 | 5.9 | 0.88 | 0.09 | BDL  | 66 | 7.9 | 33 | 0.003 | 5921.03 | 2 |
| 2016/5/9  | 20  | 3.7 | 0.63 | 5.9 | 0.66 | 0.06 | 0.20 | 61 | 10  | 34 | 0.058 | 4461.39 | 2 |
| 2016/5/11 | 36  | 8.7 | 1.0  | 8.5 | 1.1  | 0.19 | 0.34 | 66 | 9.5 | 34 | 0.647 | 5327.31 | 2 |
| 2016/5/15 | 44  | 11  | 1.1  | 9.5 | 1.1  | 0.50 | 0.53 | 73 | 7.7 | 31 | 2.188 | 3869.72 | 1 |
| 2016/5/17 | 41  | 9.9 | 1.1  | 8.8 | 1.2  | 0.67 | 0.64 | 76 | 6.8 | 30 | 2.089 | 2627.67 | 1 |
| 2016/5/19 | 36  | 7.7 | 1.1  | 7.0 | 0.93 | 0.17 | 0.29 | 66 | 7.9 | 32 | 0.792 | 3161.86 | 1 |
| 2016/5/21 | 25  | 5.8 | 0.94 | 6.2 | 0.92 | 0.02 | 0    | 65 | 9.3 | 32 | 1.402 | 2336.95 | 6 |

|            |    |     |      |     |      |      |      |    |     |    |        |         |   |
|------------|----|-----|------|-----|------|------|------|----|-----|----|--------|---------|---|
| 2016/5/23  | 39 | 7.1 | 0.93 | 7.6 | 0.98 | 0.39 | 0    | 63 | 10  | 31 | 12.116 | 2166.24 | 6 |
| 2016/5/25  | 39 | 8.1 | 1.4  | 5.7 | 0.69 | 0.11 | 0.31 | 58 | 11  | 32 | 1.066  | 1400.26 | 6 |
| 2016/5/27  | 39 | 6.6 | 1.0  | 6.6 | 0.78 | 0.16 | 0.39 | 62 | 8.3 | 32 | 1.198  | 2902.14 | 6 |
| 2016/5/29  | 46 | 6.0 | 0.88 | 6.8 | 0.89 | 0.23 | 0.52 | 61 | 8.8 | 32 | 2.901  | 902.48  | 1 |
| 2016/5/31  | 42 | 7.9 | 1.2  | 6.8 | 0.84 | 0.05 | 0.41 | 82 | 7.5 | 29 | 2.012  | 1927.43 | 1 |
| 2016/6/2   | 41 | 7.3 | 1.3  | 5.7 | 0.92 | 0.05 | 0.40 | 80 | 6.3 | 30 | 1.046  | 2302.63 | 2 |
| 2016/6/14  | 37 | 7.9 | 1.3  | 5.9 | 0.68 | 0.00 | 0.26 | 68 | 8.1 | 31 | 0.363  | 2907.11 | 6 |
| 2016/10/22 | 18 | 5.4 | 1.2  | 4.6 | 0.49 | 0.26 | 0.07 | 73 | 8.9 | 30 | 3.326  | 2077.57 | 6 |
| 2016/10/24 | 26 | 6.2 | 1.1  | 5.7 | 0.72 | 0.70 | 0.25 | 73 | 6.7 | 29 | 1.569  | 3366.86 | 1 |
| 2016/10/26 | 17 | 5.8 | 1.2  | 4.9 | 0.61 | 0.12 | 0.09 | 89 | 5.4 | 28 | 6.510  | 2059.29 | 4 |
| 2016/10/28 | 30 | 7.4 | 1.5  | 5.1 | 0.71 | 0.19 | 0.25 | 84 | 5.9 | 29 | 1.616  | 3684.34 | 4 |
| 2016/10/30 | 18 | 5.8 | 1.0  | 5.6 | 0.47 | 0.09 | 0.08 | 89 | 5.0 | 27 | 5.517  | 2707.15 | 5 |
| 2016/11/1  | 26 | 8.9 | 1.3  | 7.1 | 0.73 | 0.12 | BDL  | 82 | 6.1 | 29 | 0.203  | 2615.73 | 3 |
| 2016/11/3  | 40 | 10  | 1.6  | 6.5 | 0.92 | 0.35 | 0.39 | 75 | 5.2 | 28 | 1.372  | 3752.32 | 3 |
| 2016/11/5  | 75 | 17  | 1.9  | 9.1 | 1.3  | 1.1  | 1.4  | 70 | 4.3 | 29 | 0.001  | 3672.66 | 4 |
| 2016/11/7  | 60 | 12  | 2.3  | 5.4 | 1.2  | 1.2  | 1.4  | 80 | 3.2 | 29 | 9.042  | 787.82  | 4 |
| 2016/11/9  | 43 | 10  | 1.7  | 6.1 | 1.2  | 0.62 | 0.98 | 89 | 5.3 | 28 | 6.884  | 317.76  | 4 |
| 2016/11/13 | 49 | 14  | 1.7  | 8.6 | 1.2  | 0.19 | 0.57 | 75 | 6.3 | 29 | 3.125  | 4701.36 | 5 |
| 2016/11/15 | 44 | 12  | 1.3  | 9.1 | 1.5  | BDL  | BDL  | 72 | 5.8 | 30 | 0.028  | 4410.31 | 5 |
| 2016/11/17 | 62 | 12  | 1.3  | 9.4 | 0.99 | 0.12 | 0.45 | 67 | 7.4 | 29 | 0.000  | 7075.15 | 5 |
| 2016/11/19 | 46 | 11  | 1.1  | 9.6 | 1.2  | 0.42 | 0.61 | 74 | 6.3 | 29 | 1.836  | 2255.39 | 4 |
| 2016/11/21 | 93 | 24  | 1.6  | 15  | 1.5  | 0.46 | 0.90 | 73 | 5.8 | 30 | 0.581  | 3279.00 | 4 |
| 2016/11/23 | 57 | 13  | 1.2  | 11  | 1.1  | 0.25 | 0.48 | 75 | 6.4 | 29 | 10.938 | 1452.02 | 4 |
| 2016/11/25 | 64 | 15  | 2.3  | 6.5 | 0.95 | 0.25 | 0.57 | 83 | 4.9 | 29 | 0.156  | 3046.12 | 5 |
| 2016/11/27 | 41 | 9.3 | 0.96 | 9.6 | 0.75 | 0.15 | 0.23 | 69 | 5.6 | 29 | 0.130  | 1766.73 | 5 |

|            |     |     |      |     |      |      |      |    |     |    |       |         |   |
|------------|-----|-----|------|-----|------|------|------|----|-----|----|-------|---------|---|
| 2016/11/29 | 78  | 15  | 1.5  | 10  | 0.92 | 0.44 | 0.82 | 71 | 4.6 | 27 | 0.000 | 5736.78 | 5 |
| 2016/12/1  | 66  | 12  | 1.4  | 8.5 | 0.97 | 0.49 | 0.48 | 68 | 6.0 | 27 | 0.002 | 5181.22 | 5 |
| 2016/12/3  | 64  | 12  | 1.3  | 9.2 | 0.88 | 0.45 | 0.56 | 67 | 8.2 | 28 | 0.012 | 2908.52 | 5 |
| 2016/12/5  | 51  | 14  | 1.3  | 11  | 1.3  | 0.41 | 0.33 | 72 | 5.1 | 28 | 0.614 | 2746.71 | 5 |
| 2016/12/7  | 73  | 14  | 1.5  | 9.4 | 1.7  | 0.67 | 0.56 | 65 | 6.5 | 27 | 0.931 | 2198.62 | 5 |
| 2016/12/9  | 103 | 21  | 2.1  | 10  | 1.4  | 0.91 | 1.1  | 65 | 4.2 | 27 | 0.000 | 5908.49 | 5 |
| 2016/12/11 | 106 | 24  | 1.8  | 13  | 1.7  | 1.7  | 1.2  | 62 | 6.2 | 27 | 0.021 | 3175.09 | 4 |
| 2016/12/13 | 98  | 25  | 1.9  | 13  | 1.3  | 0.86 | 1.2  | 60 | 7.3 | 27 | 0.005 | 4615.21 | 4 |
| 2016/12/15 | 46  | 9.2 | 0.85 | 11  | 0.75 | 0.09 | 0.22 | 68 | 8.8 | 28 | 5.802 | 1251.42 | 3 |
| 2016/12/17 | 81  | 17  | 1.3  | 13  | 1.5  | 0.43 | 0.93 | 62 | 7.5 | 25 | 0.179 | 929.87  | 5 |
| 2016/12/20 | 124 | 29  | 2.0  | 15  | 2.1  | 0.75 | 2.1  | 65 | 5.8 | 29 | 0.003 | 3904.70 | 5 |
| 2016/12/27 | 50  | 13  | 0.92 | 14  | 1.0  | 0.17 | 0.40 | 58 | 5.9 | 29 | 0.000 | 5351.00 | 3 |
| 2017/1/3   | 57  | 12  | 1.3  | 9.8 | 1.1  | 0.20 | 0.54 | 70 | 7.6 | 27 | 0.114 | 2825.05 | 3 |
| 2017/1/7   | 110 | 25  | 2.0  | 12  | 2.3  | 0.59 | 1.3  | 71 | 7.0 | 28 | 2.041 | 330.58  | 4 |
| 2017/1/14  | 90  | 20  | 1.9  | 10  | 1.7  | 0.50 | 0.80 | 75 | 4.7 | 29 | 0.599 | 3377.36 | 5 |
| 2017/1/21  | 66  | 14  | 1.1  | 13  | 1.0  | 0.30 | 0.87 | 62 | 6.1 | 29 | 0.000 | 3822.33 | 3 |
| 2017/1/28  | 98  | 22  | 1.8  | 12  | 1.6  | 0.50 | 1.2  | 55 | 5.1 | 27 | 0.000 | 5900.06 | 4 |

85 BDL: below detection limits.

86

87

88 **Table S2.** The concentration of TSP, carbonaceous aerosol, WSON, WSIN, and  
 89 molecular markers in marine-, mixed-, and continental-influenced days.

|                                                           | Marine (n = 36) |       | Mixed (n = 21) |       | Continental (n = 27) |       | All (n = 84) |       |
|-----------------------------------------------------------|-----------------|-------|----------------|-------|----------------------|-------|--------------|-------|
|                                                           | Ave             | SD    | Ave            | SD    | Ave                  | SD    | Ave          | SD    |
| TSP ( $\mu\text{g m}^{-3}$ )                              | 42              | 21    | 54             | 24    | 73                   | 34    | 55           | 30    |
| OC ( $\mu\text{g m}^{-3}$ )                               | 8.4             | 2.4   | 11             | 4.7   | 17                   | 7.7   | 12           | 6.3   |
| EC ( $\mu\text{g m}^{-3}$ )                               | 1.2             | 0.32  | 1.4            | 0.48  | 1.6                  | 0.40  | 1.4          | 0.43  |
| WSOC ( $\mu\text{g m}^{-3}$ )                             | 4.6             | 1.8   | 5.2            | 2.5   | 8.5                  | 4.7   | 6.0          | 3.6   |
| WSON ( $\mu\text{gN m}^{-3}$ )                            | 0.72            | 0.25  | 1.0            | 0.34  | 1.2                  | 0.43  | 0.95         | 0.40  |
| NH <sub>4</sub> <sup>+</sup> -N ( $\mu\text{gN m}^{-3}$ ) | 0.42            | 0.38  | 0.27           | 0.25  | 0.68                 | 0.56  | 0.47         | 0.44  |
| NO <sub>3</sub> <sup>-</sup> -N ( $\mu\text{gN m}^{-3}$ ) | 0.40            | 0.28  | 0.53           | 0.39  | 0.93                 | 0.68  | 0.60         | 0.52  |
| Na <sup>+</sup> ( $\mu\text{g m}^{-3}$ )                  | 1.4             | 0.74  | 0.57           | 0.46  | 0.34                 | 0.28  | 0.86         | 0.74  |
| Cl <sup>-</sup> ( $\mu\text{g m}^{-3}$ )                  | 0.27            | 0.16  | 0.20           | 0.14  | 0.21                 | 0.10  | 0.23         | 0.14  |
| *nss-K <sup>+</sup>                                       | 0.49            | 0.16  | 0.49           | 0.25  | 0.77                 | 0.45  | 0.58         | 0.33  |
| *nss-SO <sub>4</sub> <sup>2-</sup>                        | 5.5             | 2.9   | 2.9            | 2.0   | 4.0                  | 2.6   | 4.0          | 2.6   |
| Na <sup>+</sup> / $\Sigma$ ions                           | 0.11            | 0.040 | 0.060          | 0.038 | 0.028                | 0.023 | 0.028        | 0.023 |
| OC/EC                                                     | 8.1             | 7.2   | 8.4            | 2.4   | 10.1                 | 3.0   | 8.9          | 5.2   |
| WSOC/OC                                                   | 0.54            | 0.11  | 0.44           | 0.08  | 0.49                 | 0.08  | 0.50         | 0.10  |
| WSON/WSOC                                                 | 0.17            | 0.070 | 0.22           | 0.070 | 0.17                 | 0.069 | 0.18         | 0.07  |
| Molecular tracers ( $\text{ng m}^{-3}$ )                  |                 |       |                |       |                      |       |              |       |
| Levoglucosan                                              | 70              | 54    | 140            | 112   | 337                  | 282   | 174          | 207   |
| Galactosan                                                | 2.3             | 1.4   | 4.9            | 3.6   | 11                   | 8.2   | 5.6          | 6.17  |
| Mannosan                                                  | 5.8             | 3.8   | 9.2            | 6.3   | 17                   | 12    | 10.3         | 9.29  |
| Hopanes and steranes                                      | 1.2             | 0.4   | 1.3            | 0.7   | 1.3                  | 0.7   | 1.3          | 0.60  |
| 2-MGA                                                     | 3.2             | 1.5   | 5.0            | 2.6   | 6.6                  | 4.1   | 4.8          | 3.2   |
| 2-MGL                                                     | 36              | 22    | 29             | 17    | 38                   | 23    | 35           | 21    |
| MBTCA                                                     | 11              | 7.2   | 31             | 22    | 29                   | 12    | 22           | 17    |
| o-Phthalic acid                                           | 7.9             | 4.4   | 4.1            | 3.4   | 7.5                  | 7.3   | 6.8          | 5.5   |
| p-Phthalic acid                                           | 10              | 7.9   | 31             | 25    | 43                   | 26    | 26           | 25    |

90 nss: non-sea-salt

91

92 **Table S3.** The monthly averaged WSON concentration in the selected coastal cities  
 93 that are impacted by marine air masses on a global scale and the corresponding AEC  
 94 (air mass exposure to Chl a). The Chl a concentration was from the MODIS-Aqua  
 95 (EARTHDATA, <https://giovanni.gsfc.nasa.gov/giovanni/>).

| Sites                 | Data    | Monthly averaged WSON (nmol m <sup>-3</sup> ) | AEC (mg m <sup>-3</sup> ) | References                 |
|-----------------------|---------|-----------------------------------------------|---------------------------|----------------------------|
| Keelung City          | 2006/07 | 27.2                                          | 0.136                     | Chen and Chen (2010)       |
|                       | 2006/08 | 22.9                                          | 0.190                     |                            |
| South China Sea       | 2005/04 | 65                                            | 0.163                     | Shi et al. (2010)          |
| Jiaozhou Bay, China   | 2015/07 | 190                                           | 0.860                     | Xing et al. (2018)         |
| Hong Kong             | 2011/08 | 95                                            | 0.524                     | Ho et al. (2019)           |
|                       | 2011/09 | 95                                            | 0.319                     |                            |
| Hong Kong             | 2017/01 | 130.5                                         | 0.391                     | Leung et al. (2024)        |
|                       | 2017/03 | 114.7                                         | 0.306                     |                            |
|                       | 2017/04 | 119.8                                         | 0.151                     |                            |
|                       | 2017/05 | 117.0                                         | 0.230                     |                            |
|                       | 2017/06 | 82.6                                          | 0.181                     |                            |
|                       | 2017/07 | 114.8                                         | 0.250                     |                            |
|                       | 2017/08 | 90.6                                          | 0.499                     |                            |
|                       | 2017/09 | 93.3                                          | 0.445                     |                            |
| Eastern Mediterranean | 2011/01 | 11.6                                          | 0.081                     | Tsagkaraki et al. (2021)   |
|                       | 2011/02 | 11.1                                          | 0.081                     |                            |
|                       | 2011/04 | 9.45                                          | 0.118                     |                            |
|                       | 2011/05 | 12.3                                          | 0.085                     |                            |
|                       | 2011/06 | 22.2                                          | 0.071                     |                            |
|                       | 2011/07 | 14.7                                          | 0.028                     |                            |
|                       | 2011/08 | 16.4                                          | 0.082                     |                            |
|                       | 2011/09 | 13.9                                          | 0.097                     |                            |
|                       | 2011/10 | 8.12                                          | 0.073                     |                            |
|                       | 2011/11 | 11.7                                          | 0.062                     |                            |
| Okinawa Island        | 2010/06 | 34.6                                          | 0.068                     | Kunwar and Kawamura (2014) |
|                       | 2010/07 | 2.88                                          | 0.030                     |                            |
|                       | 2010/08 | 2.88                                          | 0.035                     |                            |
|                       | 2010/09 | 5.77                                          | 0.048                     |                            |

|                      |         |        |       |                        |
|----------------------|---------|--------|-------|------------------------|
|                      | 2010/10 | 4.32   | 0.141 |                        |
| Barbados             | 2008/08 | 3.5    | 0.038 | Zamora et al. (2011)   |
| Huaniao island       | 2019/07 | 231.30 | 0.505 | Tian et al. (2023)     |
|                      | 2019/08 | 211.56 | 0.474 |                        |
| Sapporo              | 2010/06 | 6.56   | 0.159 | Pavuluri et al. (2015) |
|                      | 2010/07 | 4.63   | 0.135 |                        |
|                      | 2010/08 | 1.54   | 0.125 |                        |
| Bangkok,<br>Thailand | 2016/01 | 36.96  | 0.197 | This study             |
|                      | 2016/02 | 81.96  | 0.377 |                        |
|                      | 2016/03 | 52.03  | 0.199 |                        |
|                      | 2016/04 | 46.30  | 0.238 |                        |
|                      | 2016/05 | 63.93  | 0.311 |                        |
|                      | 2016/06 | 57.39  | 0.321 |                        |

96

97

98 **Table S4.** The mapping of bootstrap (BS) factors and Fpeak BS factors to base factors  
 99 for seven-factor solutions. (Number of bootstrap runs: 100)

|                                                  |          | Factor 1 | Factor 2 | Factor 3 | Factor 4 | Factor 5 | Factor 6 | Factor 7 | Unmapped |
|--------------------------------------------------|----------|----------|----------|----------|----------|----------|----------|----------|----------|
| BS<br>Mapping                                    | Factor 1 | 100      | 0        | 0        | 0        | 0        | 0        | 0        | 0        |
|                                                  | Factor 2 | 0        | 91       | 0        | 3        | 2        | 4        | 0        | 0        |
|                                                  | Factor 3 | 0        | 1        | 96       | 1        | 0        | 1        | 1        | 0        |
|                                                  | Factor 4 | 0        | 1        | 0        | 99       | 0        | 0        | 0        | 0        |
|                                                  | Factor 5 | 0        | 0        | 2        | 0        | 98       | 0        | 0        | 0        |
|                                                  | Factor 6 | 0        | 0        | 0        | 1        | 0        | 99       | 0        | 0        |
|                                                  | Factor 7 | 1        | 0        | 1        | 2        | 1        | 0        | 95       | 0        |
| Fpeak BC<br>Mapping<br>(Fpeak<br>value -<br>0.5) | Factor 1 | 100      | 0        | 0        | 0        | 0        | 0        | 0        | 0        |
|                                                  | Factor 2 | 0        | 92       | 2        | 3        | 1        | 2        | 0        | 0        |
|                                                  | Factor 3 | 0        | 0        | 96       | 3        | 1        | 0        | 0        | 0        |
|                                                  | Factor 4 | 0        | 0        | 1        | 97       | 2        | 0        | 0        | 0        |
|                                                  | Factor 5 | 0        | 0        | 1        | 2        | 96       | 1        | 0        | 0        |
|                                                  | Factor 6 | 0        | 0        | 0        | 2        | 0        | 98       | 0        | 0        |
|                                                  | Factor 7 | 1        | 1        | 1        | 3        | 0        | 1        | 93       | 0        |

100

101

102

103

104 **Table S5.** Displacement (DISP) diagnostics of seven-factor solutions. Bootstrapping  
 105 with displacement (BS-DISP) diagnostics of seven-factor solutions.

| Constrained DISP Diagnostics:    |              |   |   |   |   |   |   |
|----------------------------------|--------------|---|---|---|---|---|---|
| Error Code:                      | 0            |   |   |   |   |   |   |
| %dQ:                             | -0.016758291 |   |   |   |   |   |   |
| Swaps by Factor:                 | 0            | 0 | 0 | 0 | 0 | 0 | 0 |
| Constrained BS-DISP Diagnostics: |              |   |   |   |   |   |   |
| # of Cases:                      | 81           |   |   |   |   |   |   |
| %dQ:                             | -0.106123702 |   |   |   |   |   |   |
| Swaps by Factor:                 | 0            | 5 | 1 | 2 | 4 | 3 | 3 |

106

107

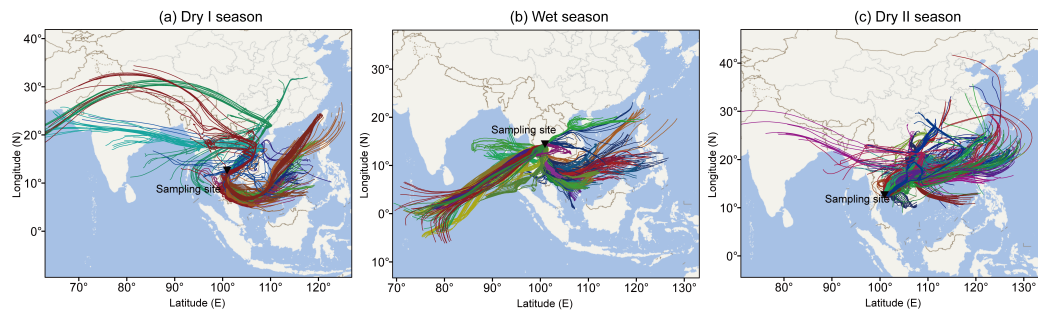

108

109 **Figure S1.** The 120 h back air-mass trajectories at Bangkok, Thailand, in the Dry I (a),  
 110 Wet (b), and Dry II seasons (c). The air mass trajectories were analyzed using the  
 111 HYSPLIT model. The map was created using ArcGIS software with the basemap from  
 112 the National Platform for Common Geospatial Information Services. Map source and  
 113 attribution: National Platform for Common Geospatial Information Services  
 114 (www.webmap.cn).

115

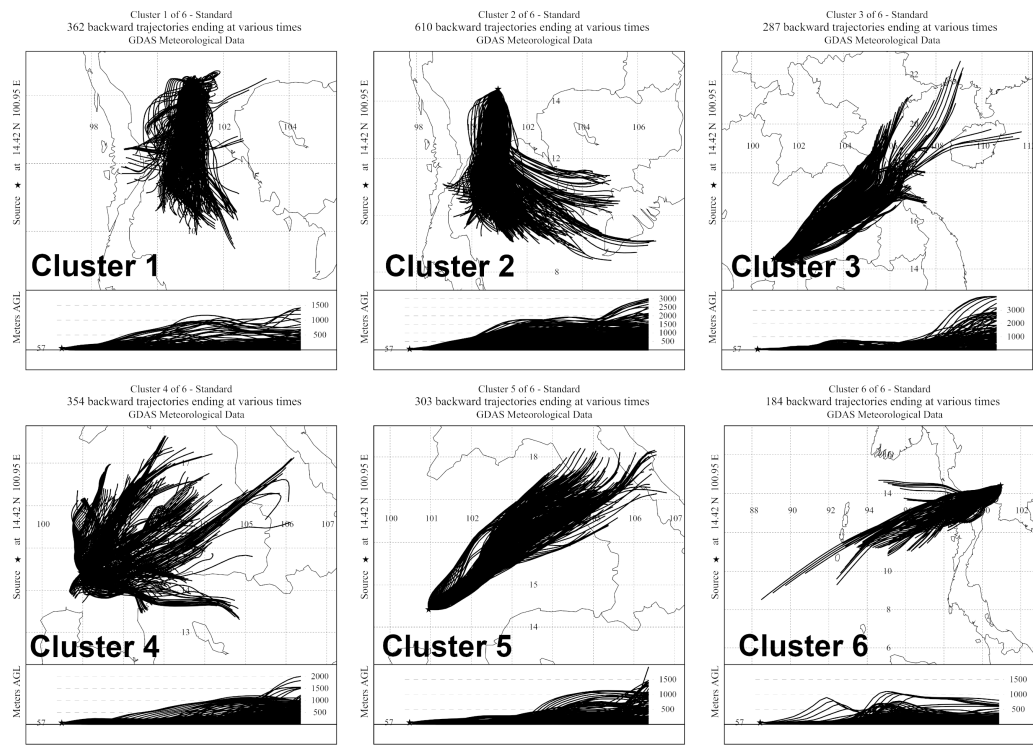

116  
 117 **Figure S2.** The 120 h back air-mass trajectories at Bangkok, from Thailand, during  
 118 January, 2016 to January, 2017. The backward trajectories were clustered into six  
 119 groups. The air mass trajectories were analyzed using the HYSPLIT model.  
 120

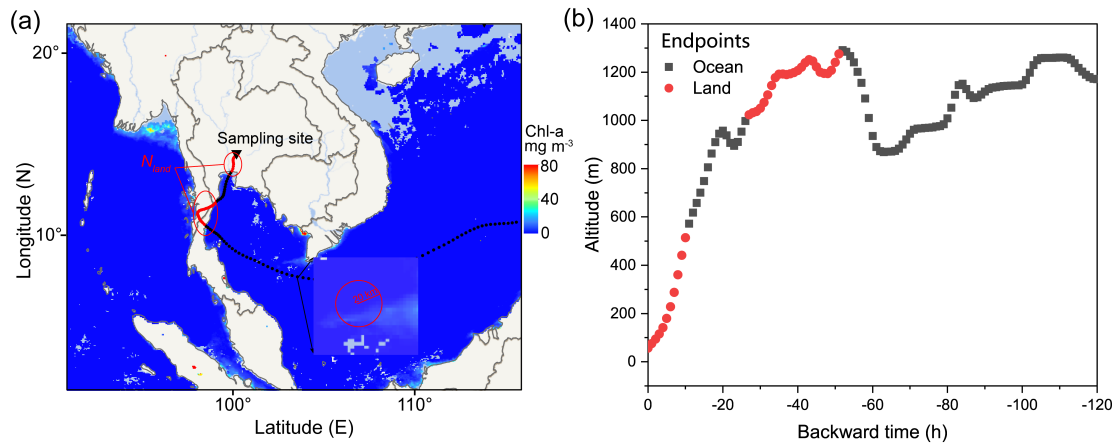

121

122 **Figure S3.** Schematic diagram of the calculations of (a)  $R_{land}$  and AEC, and (b) altitude  
 123 of each air-mass endpoints using 120-hour trajectories. The red points refer to the air-  
 124 mass endpoints along trajectories located over the land. This 20 km radius was  
 125 representative of the area used as the search radius to compute the mean Chl-a  
 126 concentration at the air-mass endpoints.

127

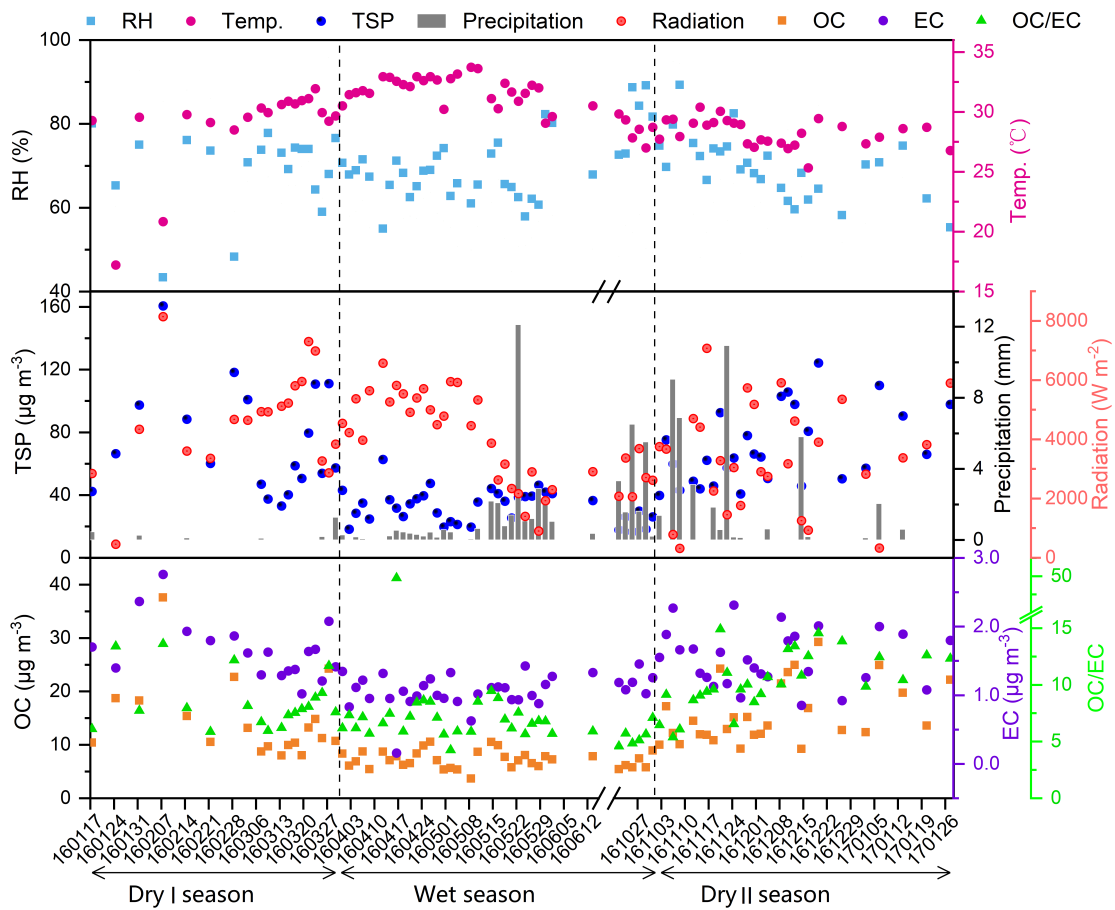

128

129 **Figure S4.** Meteorological data including relative humidity (RH), temperature (Temp.),  
 130 precipitation, and radiation, along with time-series of TSP, OC, EC, and the ratio of  
 131 OC/EC.

132

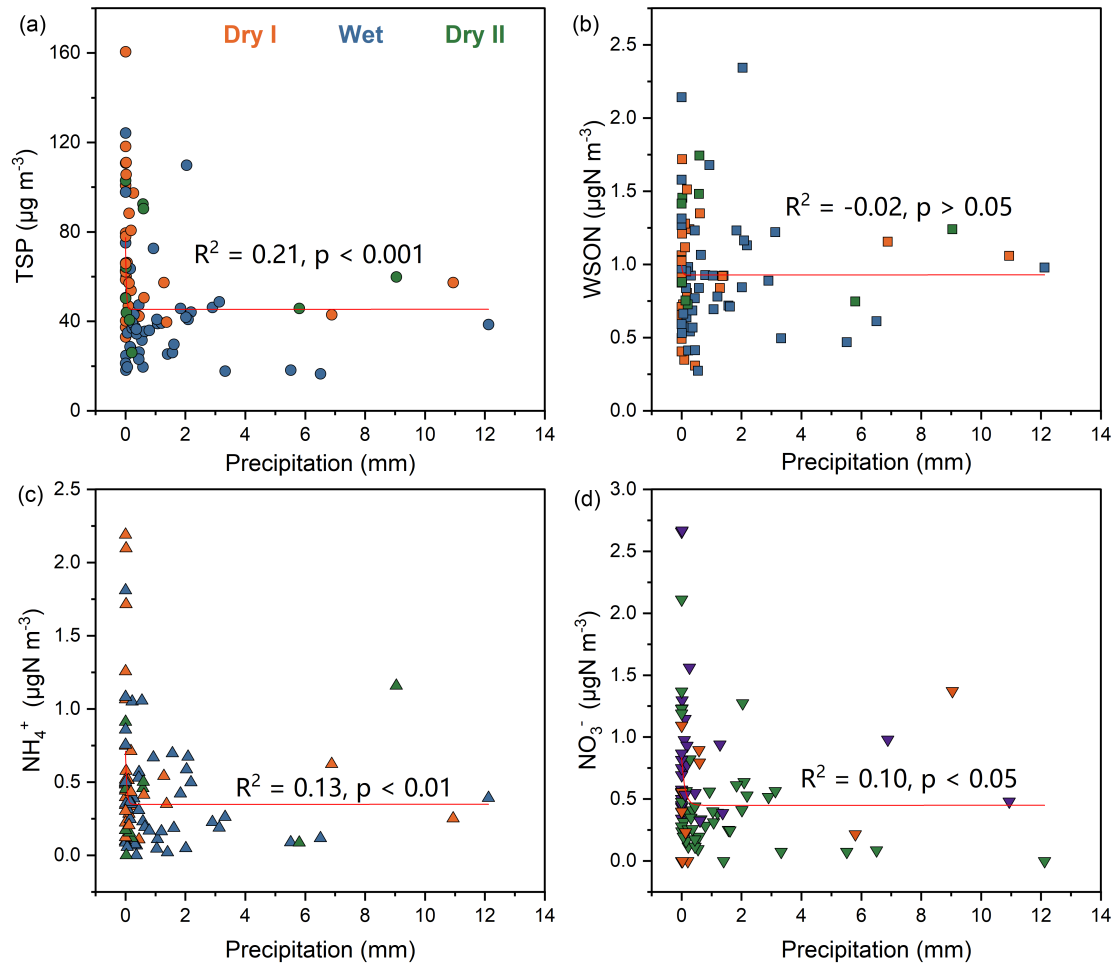

133

134 **Figure S5.** Exponential relationships between TSP (a), WSON (b), WSIN (c, d) and  
 135 precipitation.

136

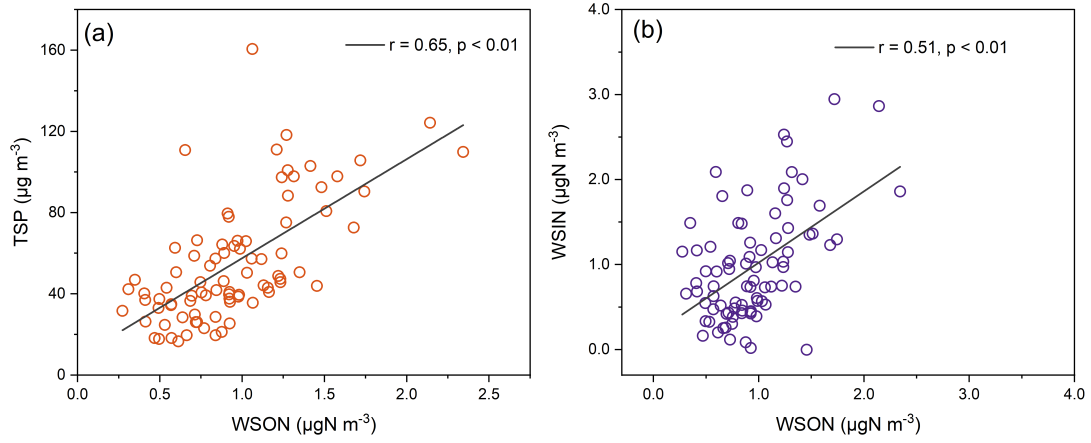

137

138 **Figure S6.** Linear relations of WSON to WSIN (sum of  $\text{NO}_3^-$ -N and  $\text{NH}_4^+$ -N).

139

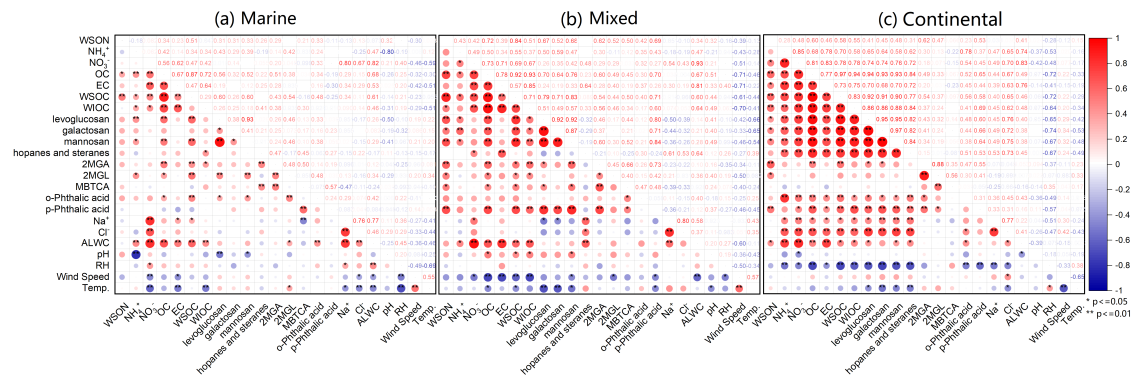

140

141 **Figure S7.** The correlation hotspots in marine- (a), mixed- (b), and continental-  
 142 influenced days (c).

143

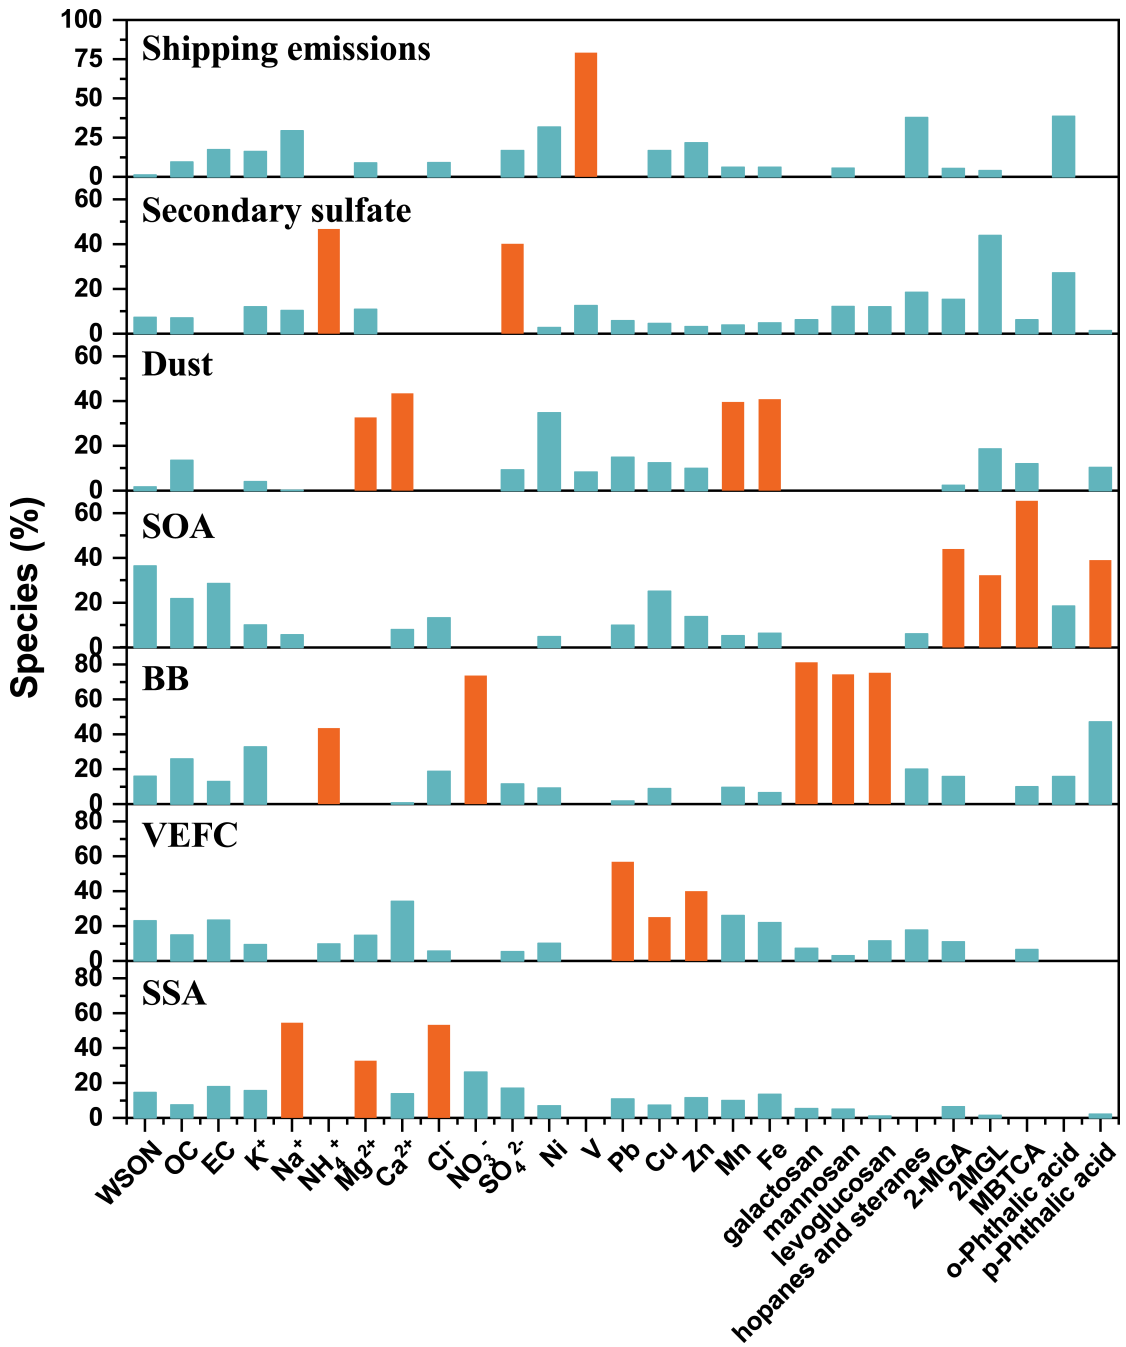

144

145 **Figure S8.** Seven factor profiles derived from the PMF solution. The percentage of  
 146 chemical species in each factor is shown.

147

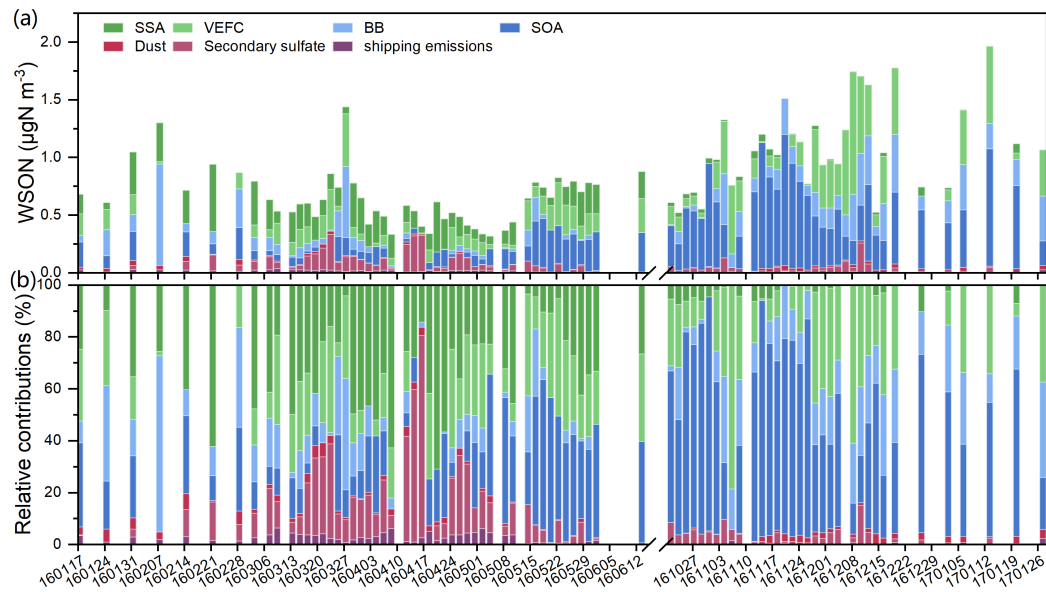

148

149 **Figure S9.** The time series of the seven PMF source factors and their relative  
 150 contributions to WSON (a, b).

151

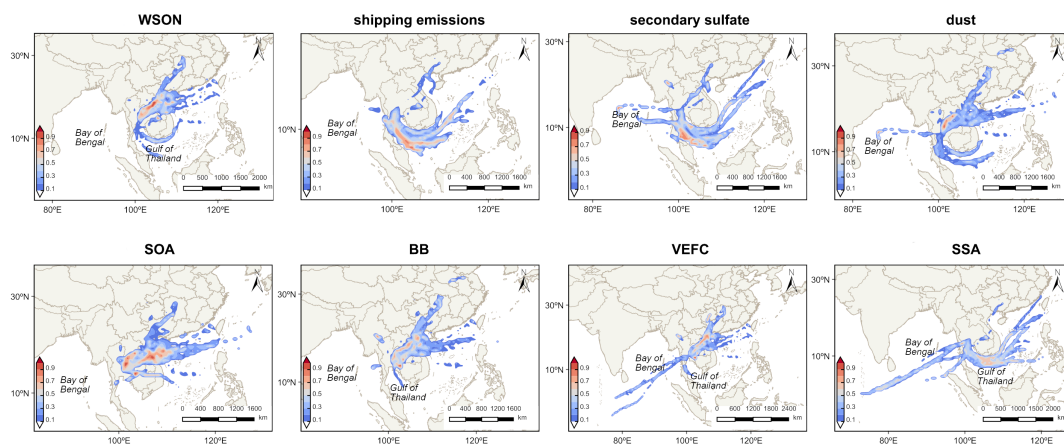

152

153 **Figure S10.** PSCF results of WSON and the seven-factor derived WSON resolved by  
 154 PMF model. Threshold values were set as the 75th percentile of the corresponding  
 155 values. The 120-hr backward air mass trajectory was analyzed using the HYSPLIT  
 156 model.

157

158

159 **References:**

160 Celso, V., Dabek-Zlotorzynska, E., and McCurdy, M.: Chemical Characterization of  
161 Exhaust Emissions from Selected Canadian Marine Vessels: The Case of Trace  
162 Metals and Lanthanoids, *Environ. Sci. Technol.*, 49, 5220-5226,  
163 <https://doi.org/10.1021/acs.est.5b00127>, 2015.

164 Chen, H.-Y., and Chen, L.-D.: Occurrence of water soluble organic nitrogen in aerosols  
165 at a coastal area, *J. Atmos. Chem.*, 65, 49-71, [https://doi.org/10.1007/s10874-](https://doi.org/10.1007/s10874-010-9181-y)  
166 [010-9181-y](https://doi.org/10.1007/s10874-010-9181-y), 2010.

167 Facchini, M. C., Rinaldi, M., Decesari, S., Carbone, C., Finessi, E., Mircea, M., Fuzzi,  
168 S., Ceburnis, D., Flanagan, R., Nilsson, E. D., de Leeuw, G., Martino, M., Woeltjen,  
169 J., and O'Dowd, C. D.: Primary submicron marine aerosol dominated by insoluble  
170 organic colloids and aggregates, *Geophys. Res. Lett.*, 35,  
171 <https://doi.org/10.1029/2008GL034210>, 2008.

172 Fountoukis, C., and Nenes, A.: ISORROPIA II: a computationally efficient  
173 thermodynamic equilibrium model for  $K^+Ca^{2+}Mg^{2+}NH_4^+Na^+SO_4^{2-}NO_3^-$ -  
174  $Cl^-H_2O$  aerosols, *Atmos. Chem. Phys.*, 7, 4639-4659,  
175 <https://doi.org/10.5194/acp-7-4639-2007>, 2007.

176 Geng, X., Mo, Y., Li, J., Zhong, G., Tang, J., Jiang, H., Ding, X., Malik, R. N., and Zhang,  
177 G.: Source apportionment of water-soluble brown carbon in aerosols over the  
178 northern South China Sea: Influence from land outflow, SOA formation and marine  
179 emission, *Atmos. Environ.*, 229, 117484,  
180 <https://doi.org/10.1016/j.atmosenv.2020.117484>, 2020.

181 Ho, S. S. H., Li, L., Qu, L., Cao, J., Lui, K. H., Niu, X., Lee, S.-C., and Ho, K. F.:  
182 Seasonal behavior of water-soluble organic nitrogen in fine particulate matter  
183 ( $PM_{2.5}$ ) at urban coastal environments in Hong Kong, *Air Qual. Atmos. Health*, 12,  
184 389-399, <https://doi.org/10.1007/s11869-018-0654-5>, 2019.

185 Kunwar, B., and Kawamura, K.: One-year observations of carbonaceous and  
186 nitrogenous components and major ions in the aerosols from subtropical Okinawa  
187 Island, an outflow region of Asian dusts, *Atmos. Chem. Phys.*, 14, 1819-1836,  
188 <https://doi.org/10.5194/acp-14-1819-2014>, 2014.

189 Leung, C. W., Wang, X., and Hu, D.: Characteristics and source apportionment of  
190 water-soluble organic nitrogen (WSON) in  $PM_{2.5}$  in Hong Kong: With focus on  
191 amines, urea, and nitroaromatic compounds, *J. Hazard. Mater.*, 469, 133899,  
192 <https://doi.org/10.1016/j.jhazmat.2024.133899>, 2024.

193 Li, X. G., Wang, S. X., Duan, L., Hao, J., Li, C., Chen, Y. S., and Yang, L.: Particulate  
194 and trace gas emissions from open burning of wheat straw and corn stover in

- 195 China, *Environ. Sci. Technol.*, 41, 6052-6058, <https://doi.org/10.1021/es0705137>,  
196 2007.
- 197 Pavuluri, C. M., Kawamura, K., and Fu, P. Q.: Atmospheric chemistry of nitrogenous  
198 aerosols in northeastern Asia: biological sources and secondary formation, *Atmos.*  
199 *Chem. Phys.*, 15, 9883-9896, <https://doi.org/10.5194/acp-15-9883-2015>, 2015.
- 200 Petit, J. E., Favez, O., Albinet, A., and Canonaco, F.: A user-friendly tool for  
201 comprehensive evaluation of the geographical origins of atmospheric pollution:  
202 Wind and trajectory analyses, *Environ. Modell. Softw.*, 88, 183-187,  
203 <https://doi.org/10.1016/j.envsoft.2016.11.022>, 2017.
- 204 Shi, J., Gao, H., Qi, J., Zhang, J., and Yao, X.: Sources, compositions, and distributions  
205 of water-soluble organic nitrogen in aerosols over the China Sea, *J. Geophys.*  
206 *Res.-Atmos.*, 115, <https://doi.org/10.1029/2009JD013238>, 2010.
- 207 Tang, J., Xu, B., Zhao, S., Li, J., Tian, L., Geng, X., Jiang, H., Mo, Y., Zhong, G., Jiang,  
208 B., Chen, Y., Tang, J., and Zhang, G.: Long-Emission-Wavelength Humic-Like  
209 Component (L-HULIS) as a Secondary Source Tracer of Brown Carbon in the  
210 Atmosphere, *J. Geophys. Res.-Atmos.*, 129, e2023JD040144,  
211 <https://doi.org/10.1029/2023JD040144>, 2024.
- 212 Tian, M., Li, H., Wang, G., Fu, M., Qin, X., Lu, D., Liu, C., Zhu, Y., Luo, X., Deng, C.,  
213 Abdullaev, S. F., and Huang, K.: Seasonal source identification and formation  
214 processes of marine particulate water soluble organic nitrogen over an offshore  
215 island in the East China Sea, *Sci. Total Environ.*, 863, 160895,  
216 <https://doi.org/10.1016/j.scitotenv.2022.160895>, 2023.
- 217 Tiwari, S., Kaskaoutis, D., Soni, V. K., Dev Attri, S., and Singh, A. K.: Aerosol columnar  
218 characteristics and their heterogeneous nature over Varanasi, in the central  
219 Ganges valley, *Environ Sci Pollut Res Int*, 25, 24726-24745,  
220 <https://doi.org/10.1007/s11356-018-2502-4>, 2018.
- 221 Tsagkaraki, M., Theodosi, C., Grivas, G., Vargiakaki, E., Sciare, J., Savvides, C., and  
222 Mihalopoulos, N.: Spatiotemporal variability and sources of aerosol water-soluble  
223 organic nitrogen (WSO<sub>N</sub>), in the Eastern Mediterranean, *Atmos. Environ.*, 246,  
224 118144, <https://doi.org/10.1016/j.atmosenv.2020.118144>, 2021.
- 225 Viana, M., Amato, F., Alastuey, A., Querol, X., Moreno, T., García Dos Santos, S., Herce,  
226 M. D., and Fernández-Patier, R.: Chemical Tracers of Particulate Emissions from  
227 Commercial Shipping, *Environ. Sci. Technol.*, 43, 7472-7477,  
228 <https://doi.org/10.1021/es901558t>, 2009.
- 229 Xing, J., Song, J., Yuan, H., Wang, Q., Li, X., Li, N., Duan, L., and Qu, B.: Water-soluble  
230 nitrogen and phosphorus in aerosols and dry deposition in Jiaozhou Bay, North  
231 China: Deposition velocities, origins and biogeochemical implications, *Atmos.*

- 232 Res., 207, 90-99, <https://doi.org/10.1016/j.atmosres.2018.03.001>, 2018.
- 233 Xu, B., Zhang, G., Gustafsson, Ö., Kawamura, K., Li, J., Andersson, A., Bikkina, S.,  
234 Kunwar, B., Pokhrel, A., Zhong, G., Zhao, S., Li, J., Huang, C., Cheng, Z., Zhu, S.,  
235 Peng, P., and Sheng, G.: Large contribution of fossil-derived components to  
236 aqueous secondary organic aerosols in China, *Nat. Commun.*, 13, 5115,  
237 <https://doi.org/10.1038/s41467-022-32863-3>, 2022.
- 238 Zamora, L. M., Prospero, J. M., and Hansell, D. A.: Organic nitrogen in aerosols and  
239 precipitation at Barbados and Miami: Implications regarding sources, transport  
240 and deposition to the western subtropical North Atlantic, *J. Geophys. Res.-Atmos.*,  
241 116, <https://doi.org/10.1029/2011JD015660>, 2011.
- 242
- 243
